# Supplementary material for: Favipiravir Analogues as Inhibitors of SARS-CoV-2 RNA-Dependent RNA Polymerase, Combined Quantum Chemical Modeling, Quantitative Structure–Property Relationship, and Molecular Docking Study
Source: MDPI journal article supplement (doi:10.3390/molecules29020441), 2024-01-16
Supplement: s1 [file s1]

Favipiravir Analogues as Inhibitors of SARS-CoV-2 RNA-dependent RNA Polymerase, Combined Quantum Chemical Modelling, QSPR and Molecular Docking Study  
Magdalena Latosińska and Jolanta Natalia Latosińska\*

Supplementary

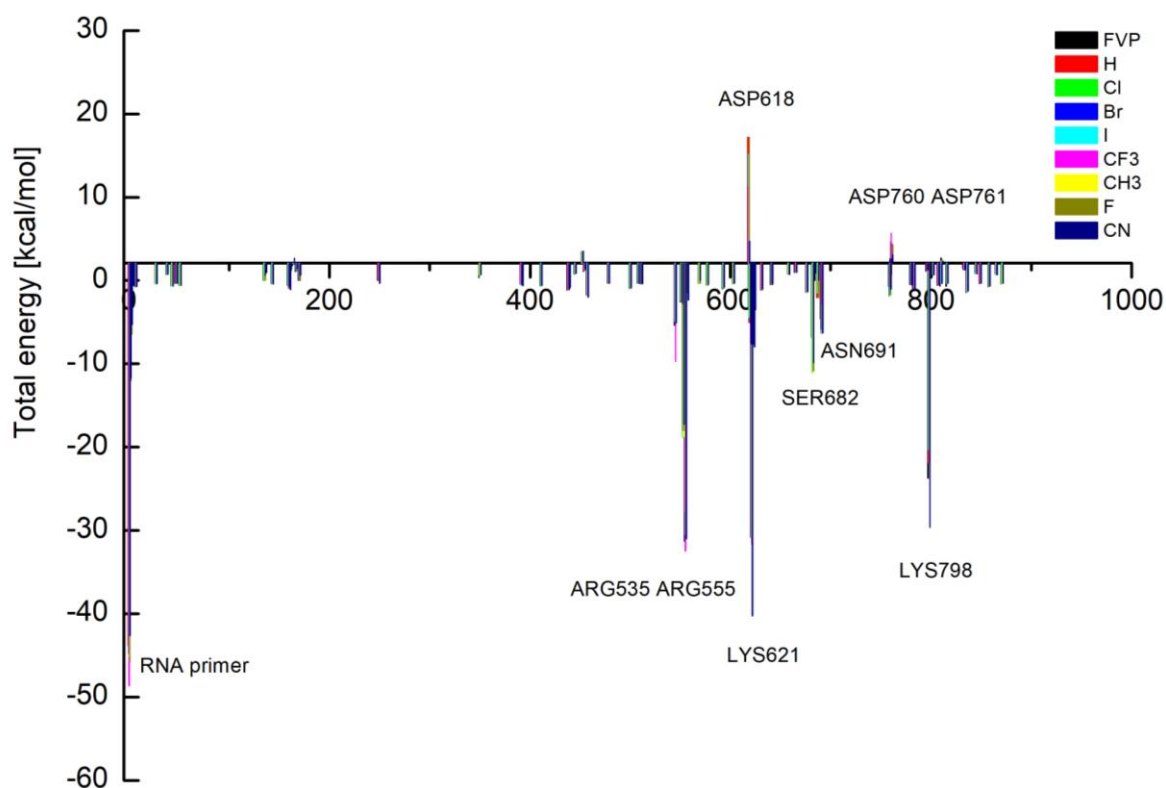

**Figure S1.** The comparison of the total binding energy of FVR-RTP analogues to RdRp, RNA primer, RNA template and cofactor (the RdRp target from 7CTT [81]).

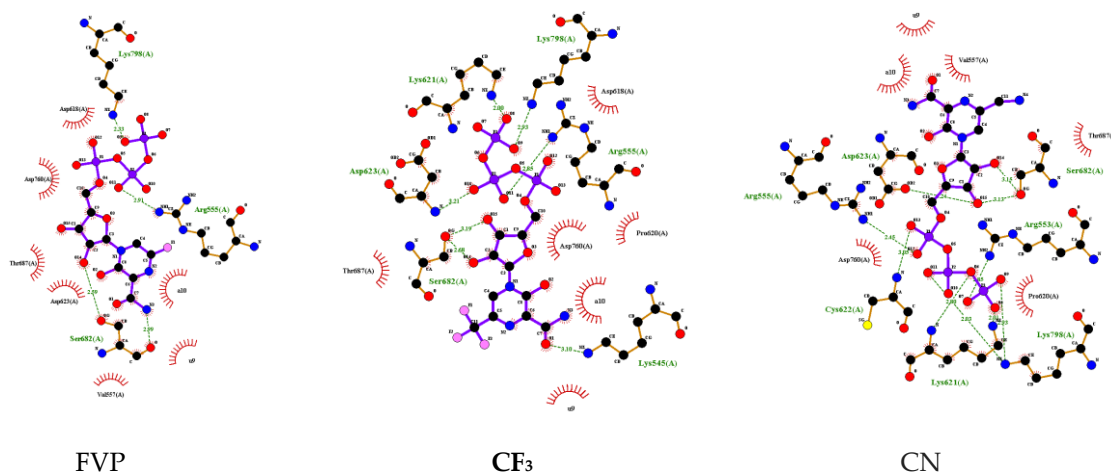

**Figure S2.** A LigPlot+ schematic 2D representation of the protein-ligand interactions (the RdRp target from 7CTT[81]). The hydrogen bonds are shown as green dashed lines, residues involved in hydrophobic contacts are shown as red arcs and labeled.

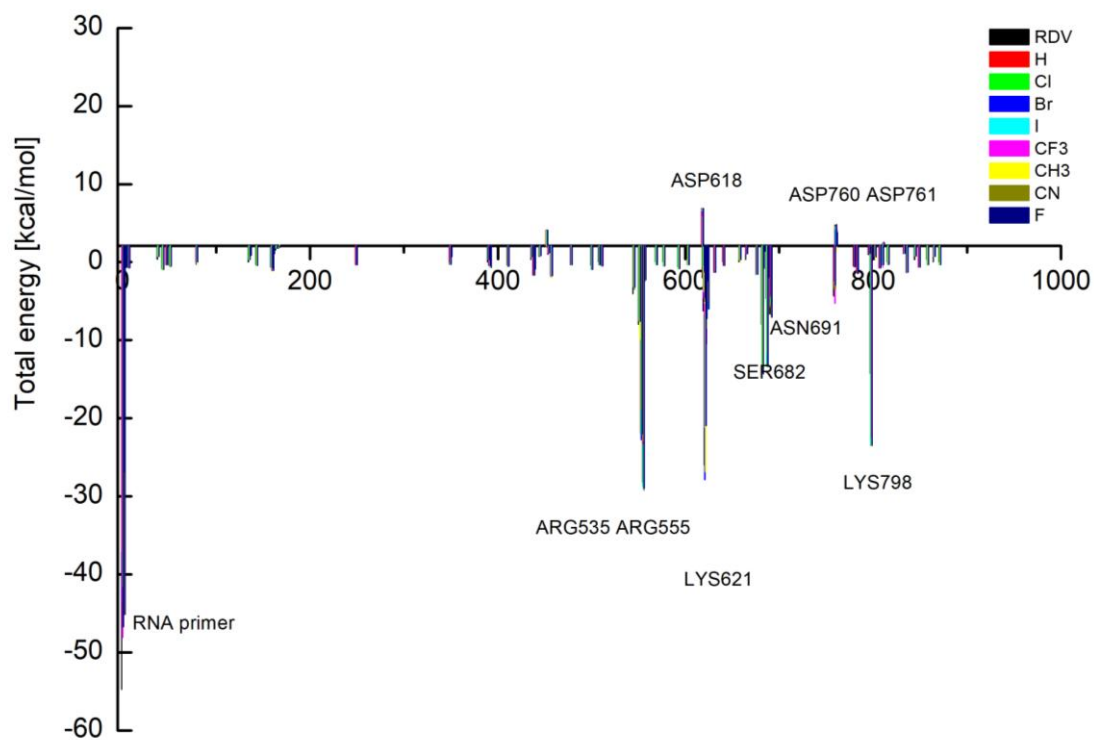

**Figure S3.** The comparison of the total binding affinity of FVR-RTP analogues with RdRp, RNA primer, RNA template and cofactor (the RdRp target from 7UO4).

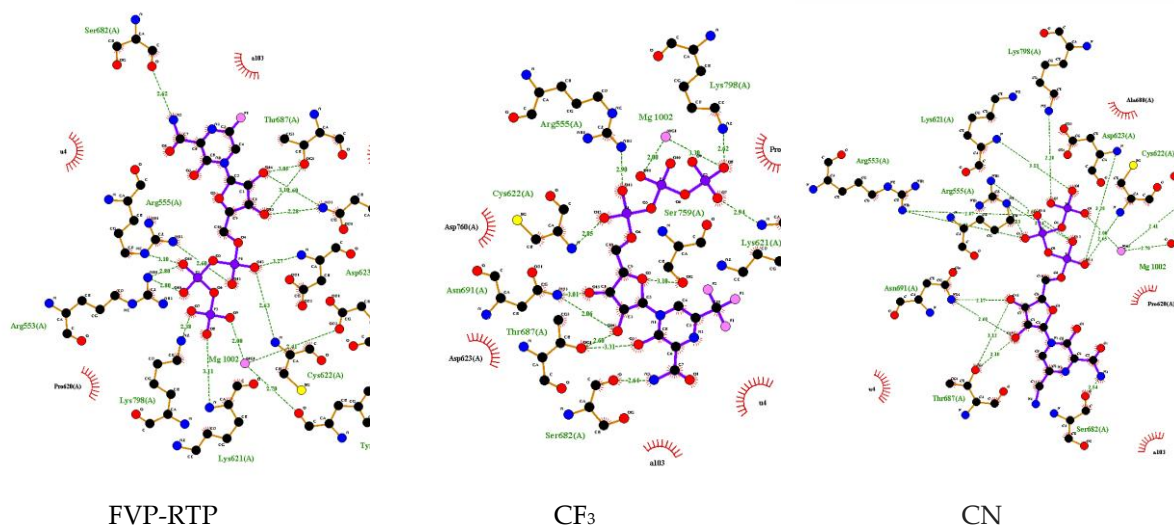

**Figure S4.** A LigPlot+ schematic 2D representation of the protein-ligand interactions (the RdRp target from 7UO4[80]). The hydrogen bonds are shown as green dashed lines, residues involved in hydrophobic contacts are shown as red arcs and labeled.

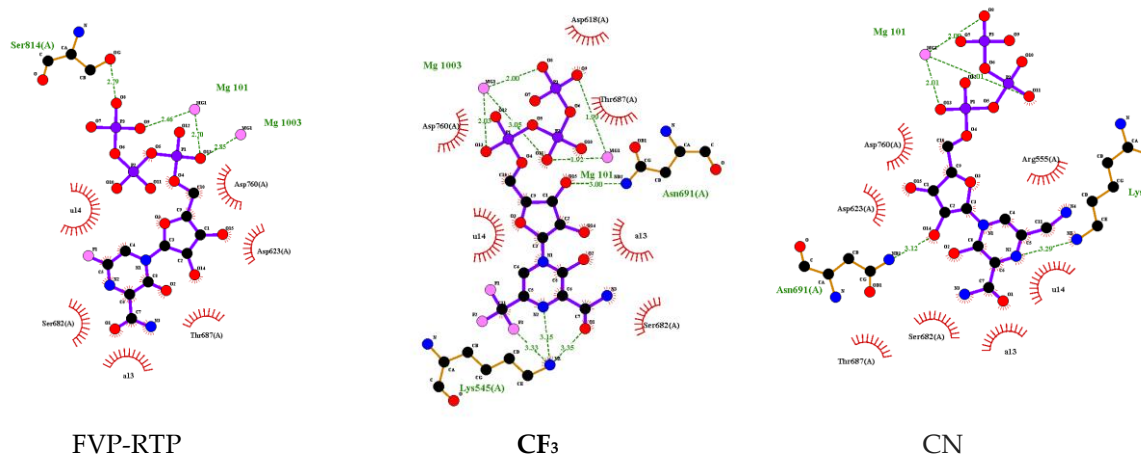

**Figure S5.** A LigPlot+ schematic 2D representation of the protein-ligand interactions (target from 7AAP[84]). The hydrogen bonds are shown as green dashed lines, residues involved in hydrophobic contacts are shown as red arcs and labeled.

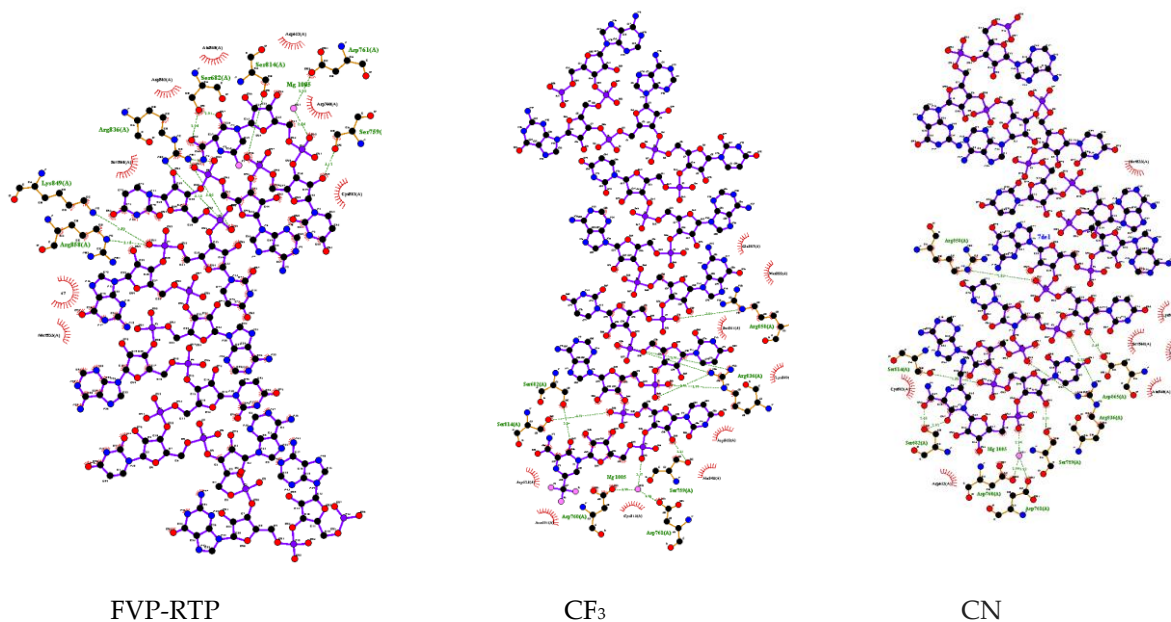

**Figure S6.** A LigPlot+ schematic 2D representation of the protein-ligand interactions (target from 7DFG[85]). The hydrogen bonds are shown as green dashed lines, residues involved in hydrophobic contacts are shown as red arcs and labeled.

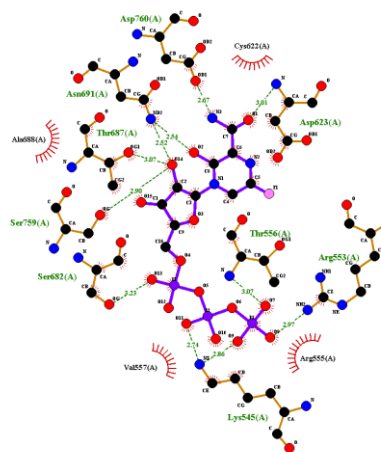

FVP-RTP

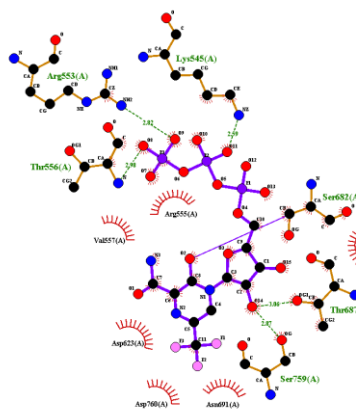

CF<sub>3</sub>

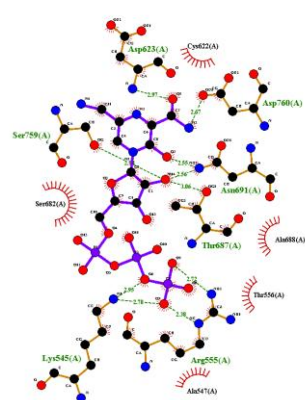

CN

**Figure S7.** A LigPlot+ schematic 2D representation of the protein-ligand interactions (the RdRp target from 6M71[74]). The hydrogen bonds are shown as green dashed lines, residues involved in hydrophobic contacts are shown as red arcs and labeled.
